# Supplementary material for: Development of a Universal Second-Tier Newborn Screening LC–MS/MS Method for Amino Acids, Lysophosphatidylcholines, and Organic Acids
Source: PubMed Central journal article supplement — Anal Chem. 2023 Feb 1;95(6):3187–94. doi: 10.1021/acs.analchem.2c03098 (PMC9933048; doi:10.1021/acs.analchem.2c03098), 2023-02-01
Supplement: ac2c03098_si_001.pdf [file ac2c03098_si_001.pdf]

Supporting Information:

**Development of a Universal Second-tier Newborn Screening LC-MS/MS Method for Amino Acids, Lysophosphatidylcholines, and Organic Acids**

Matthew B. Kilgore<sup>#1</sup>, Dimitrios Platis<sup>#2</sup>, Timothy Lim<sup>1</sup>, Samantha Isenberg<sup>1</sup>, C. Austin Pickens<sup>1</sup>, Carla Cuthbert<sup>1</sup>, Konstantinos Petritis<sup>\*1</sup>

<sup>1</sup>Newborn Screening and Molecular Biology Branch, US Centers for Disease Control and Prevention, Atlanta, Georgia, 30341, USA

<sup>2</sup>Institute of Child Health, Department of Newborn Screening, Athens, PC 115 26 Greece

<sup>#</sup>These authors contributed equally to this work

<sup>\*</sup>Corresponding author: Konstantinos Petritis, e-mail: nmo3@cdc.gov

TABLE OF CONTENTS

|                                                                                                                                                                |         |
|----------------------------------------------------------------------------------------------------------------------------------------------------------------|---------|
| COVER PAGE.....                                                                                                                                                | S1      |
| SUPPLEMENTAL MATERIALS: .....                                                                                                                                  | S2      |
| SUPPLEMENTAL FIGURES:.....                                                                                                                                     | S2      |
| <b>Supplemental Figure 1.</b> Resolution of alle and Leu and alle and Ile with differing concentrations of mobile phase ammonium formate and acetonitrile..... | S2      |
| <b>Supplemental Figure 2.</b> Change in the retention time of Ile, alle, and Leu with changing column temperature.....                                         | S3      |
| <b>Supplemental Figure 3.</b> Change in the resolution of Ile and alle and Leu and alle with changing flow rate.....                                           | S3      |
| <b>Supplemental Figure 4.</b> Improvement of analyte signal on addition to the mobile phase of formic acid or oxalic acid.....                                 | S4      |
| <b>Supplemental Figure 5.</b> A heat map showing the effect of extraction solvent composition on internal standard fold change.....                            | S4      |
| <b>Supplemental Figure 6.</b> A heat map showing the effect of extraction solvent composition on concentration fold change.....                                | S5      |
| <b>Supplemental Figure 7.</b> A heat map showing the effects of varying extraction conditions on internal standard fold change.....                            | S5      |
| <b>Supplemental Figure 8.</b> A heat map showing the effects of varying extraction conditions on concentration fold change.....                                | S6      |
| SUPPLEMENTAL TABLES:.....                                                                                                                                      | S7      |
| <b>Supplemental Table 1.</b> Diseases and second-tier biomarkers of interest.....                                                                              | S7      |
| <b>Supplemental Table 2.</b> Manufacturer information for chemicals.....                                                                                       | S8-S10  |
| <b>Supplemental Table 3.</b> Enrichment of every DBS level made for validation.....                                                                            | S10     |
| <b>Supplemental Table 4.</b> Multiple reaction monitoring table with retention times for final method.....                                                     | S11     |
| <b>Supplemental Table 5.</b> Multiple reaction monitoring transitions with retention times for attempted biomarkers.....                                       | 12      |
| <b>Supplemental Table 6.</b> Concentration of biomarker spikes, relative to DBS volume, for accuracy analysis.....                                             | S13     |
| <b>Supplemental Table 7.</b> Separation of biomarker and interferences.....                                                                                    | S14     |
| <b>Supplemental Table 8.</b> Biomarker recovery and accuracy.....                                                                                              | S15-S17 |
| <b>Supplemental Table 9.</b> Biomarker imprecision and reproducibility results broken down by enrichment level.....                                            | S18     |
| <b>Supplemental Table 10.</b> Ruggedness with biomarker concentrations over different treatments and limits.....                                               | S19-S20 |
| <b>Supplemental Table 11.</b> Stability DBS concentration after different treatments with upper and lower limits.....                                          | S21-S24 |
| REFERENCES.....                                                                                                                                                | S26     |

**SUPPLEMENTAL MATERIALS:**

Standards used in the study and their abbreviations are detailed in Supplemental Table 2.

**SUPPLEMENTAL FIGURES:**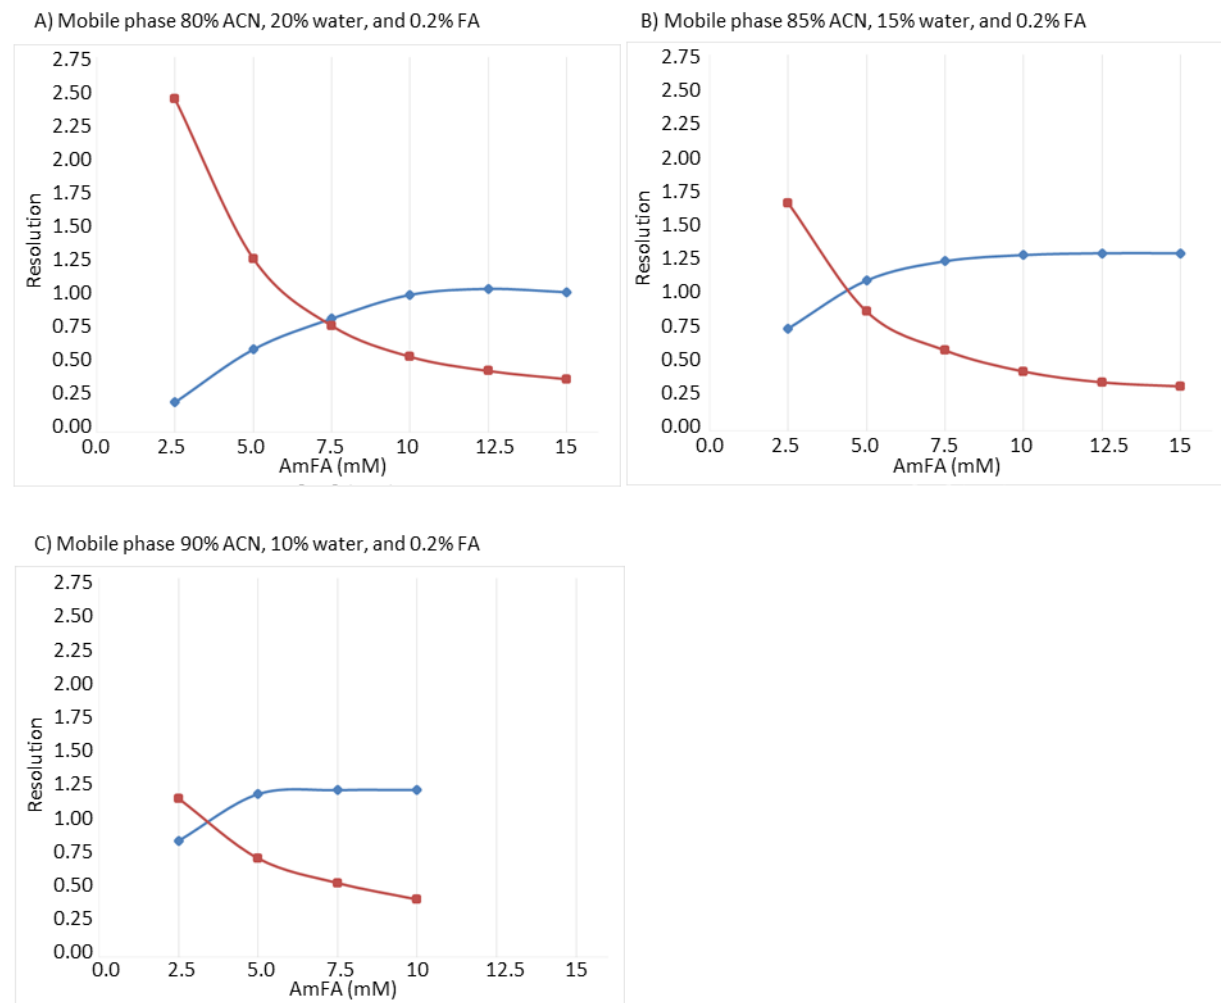

**Supplemental Figure 1.** Resolution of alle and Leu (blue) and alle and Ile (red) with differing concentrations of mobile phase ammonium formate (AmFA) on the x-axis. Each panel shows the results for a different percentage of ACN and water in the mobile phase, all conditions have 0.2% FA A) 80% ACN and 20% water, B) 85% ACN and 15% water, and C) 90% ACN and 10% water. Experiment uses a waters TQD mass spectrometer with an Imtakt Intrada amino acid column (3  $\mu$ m, 50 x 3 mm) with an isocratic gradient at 0.4 ml/min and a column temperature of 30°C.

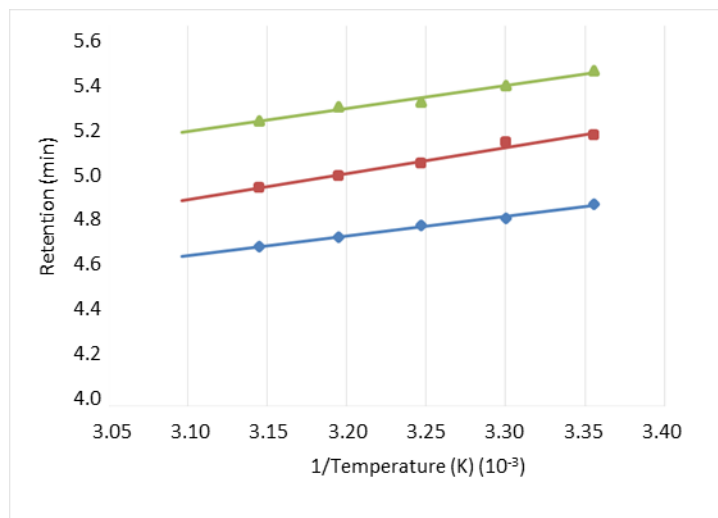

**Supplemental Figure 2.** Change in the retention time of Ile (green), alle (red), and Leu (blue) with changing column 1/temperature in Kelvin (K). Method is using a waters TQD mass spectrometer with an Imtakt Intrada amino acid column (3  $\mu\text{m}$ , 50 x 3 mm) with an isocratic gradient 85% ACN, 15% water, 0.2% FA, and 5 mM AmFA at a flow rate of 0.4 ml/min.

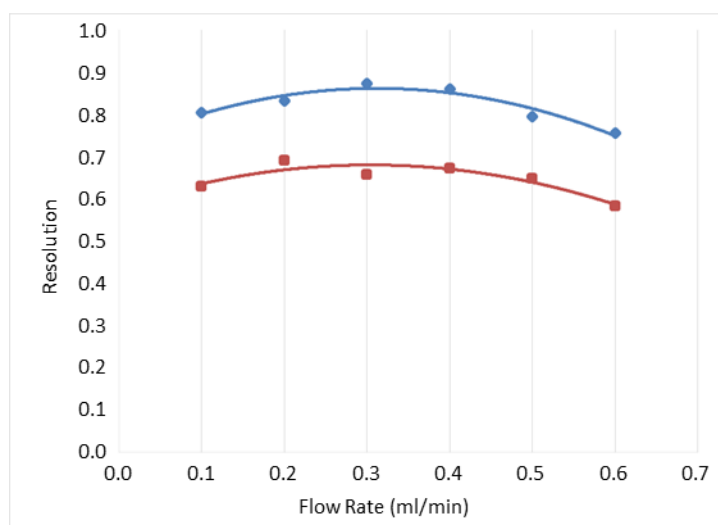

**Supplemental Figure 3.** Change in the resolution of Ile and alle (red) and Leu and alle (blue) with changing flow rate in ml/min. Method is using a waters TQD mass spectrometer with an Imtakt Intrada amino acid column (3  $\mu\text{m}$ , 50 x 3 mm) with an isocratic gradient 85% ACN, 15% water, 0.2% FA, and 5 mM AmFA and a column temperature 30°C.

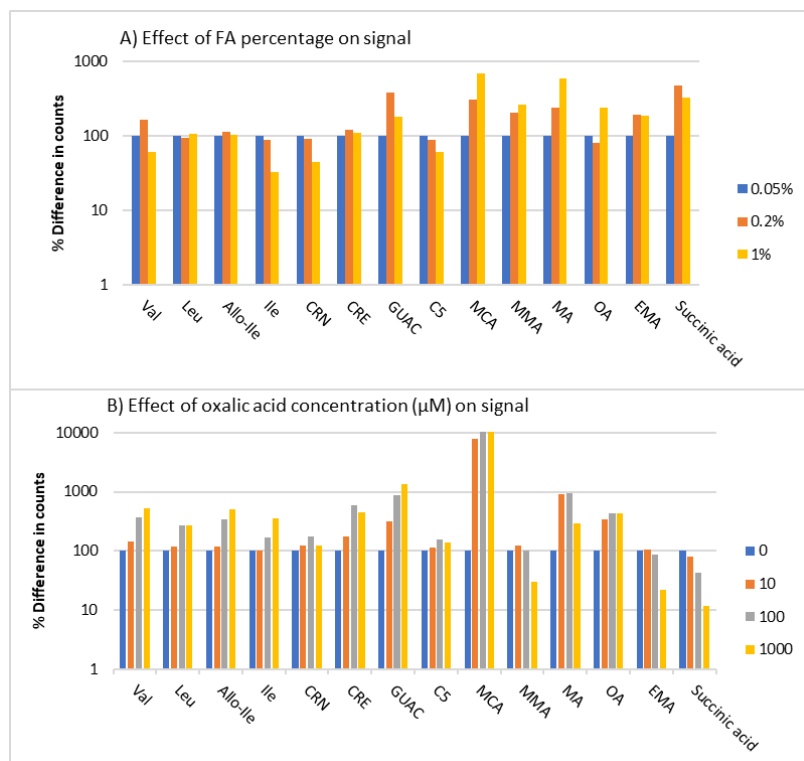

**Supplemental Figure 4.** Improvement of analyte signal on addition to the mobile phase of A) FA percentage or B) oxalic acid concentration ( $\mu\text{M}$ ). Using a TQD waters mass spectrometer, the chromatography method differs from the chromatography used for validation in that it uses a different default mobile phase A (85% ACN, 15% water, 6.5 AmFA, and 0.2% FA) and mobile phase B (10% ACN, 90% water, and 140 mM AmFA) with a constant flow rate (0.35 ml/min). The gradient proceeds as follows, with linear gradients between time points mobile phase A is 100% at 0.0 min, 100% at 7.0 min, 0% at 12 min, 0% at 15 min, 100% at 25 min, and 0% at 30 min.

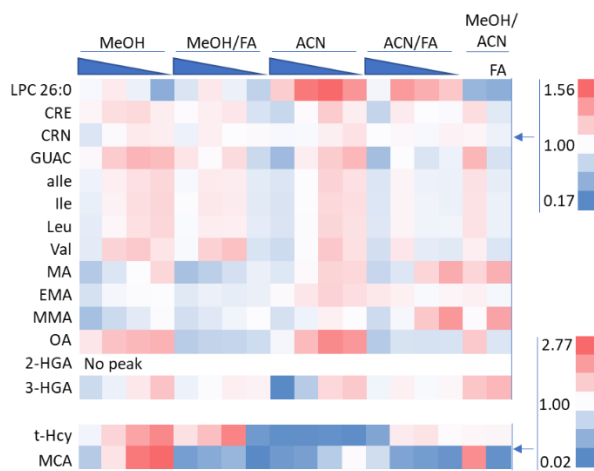

**Supplemental Figure 5.** A heat map showing the effect of extraction solvent composition on internal standard fold change relative to the mean value of each analyte. Solvents tested include either equal percentages MeOH/ACN/water (MeOH/ACN) or variable percentages of MeOH/water (MeOH) and ACN/water (ACN), 100/0, 90/10, 80/20, and 70/30, with or without 0.1% FA. Above 1 is red, below 1 is blue, and 1 is white. Material extracted was CDC NSQAP QC material lot# D1814.

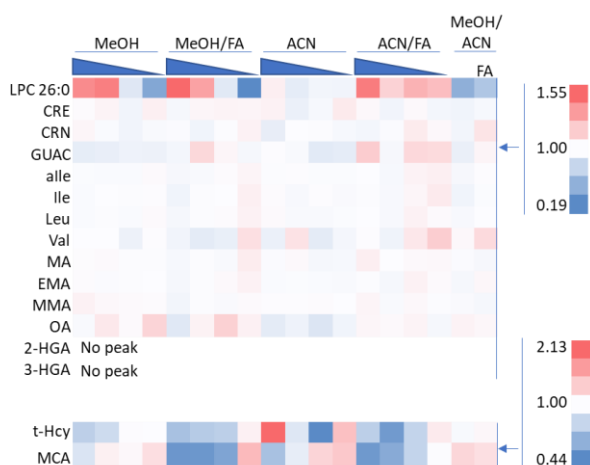

**Supplemental Figure 6.** A heat map showing the effect of extraction solvent composition on concentration fold change relative to the mean value of each analyte. Solvents tested include either equal percentages MeOH/ACN/water (MeOH/ACN) or variable percentages of MeOH/water (MeOH) and ACN/water (ACN), 100/0, 90/10, 80/20, and 70/30, with or without 0.1% FA. Above 1 is red, below 1 is blue, and 1 is white. Material extracted was CDC NSQAP QC material lot# D1814.

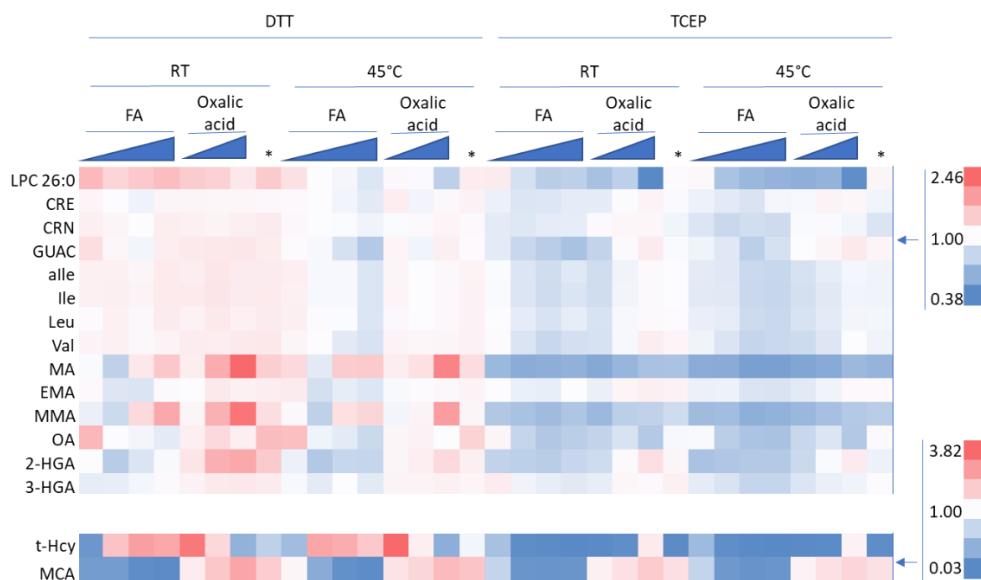

**Supplemental Figure 7.** A heat map showing the effects of varying extraction conditions on internal standard fold change relative to the mean value of each analyte. Conditions tested include DTT or TCEP reduction, room temperature or 45°C extraction, variable formic acid (FA at 0, 0.05, 0.1, or 0.2%) or variable oxalic acid (1, 3, or 9 mM) using 0.1% FA. In addition, 3 mM oxalic acid with no FA was tested (\*). All conditions use 80% acetonitrile with 20% water. Above 1 is red, below 1 is blue, and 1 is white. Material extracted was CDC QC material lot# D1814.

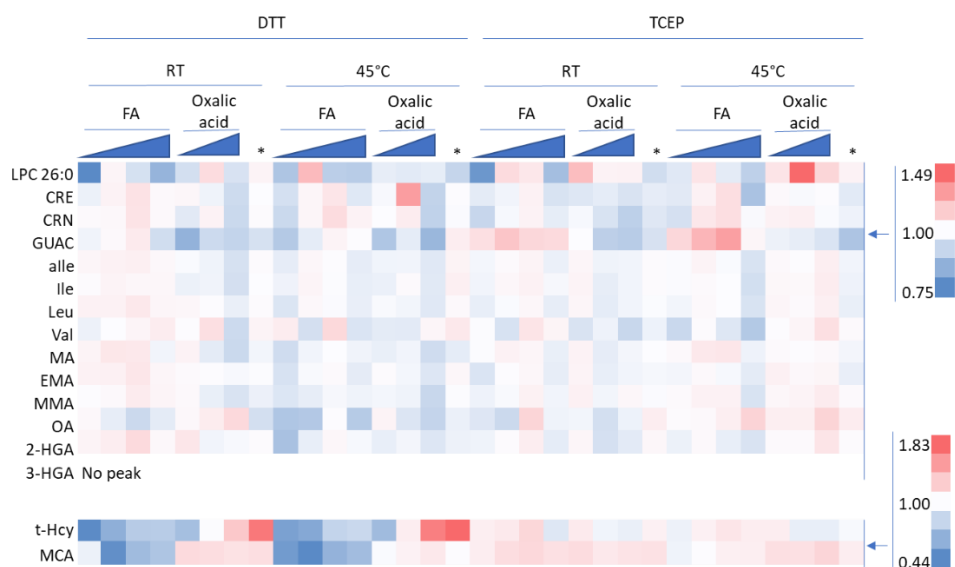

**Supplemental Figure 8.** A heat map showing the effects of varying extraction conditions on concentration fold change relative to the mean value of each analyte. Conditions tested include DTT or TCEP reduction, room temperature or 45°C extraction, variable formic acid (FA at 0, 0.05, 0.1, or 0.2%) or variable oxalic acid (1, 3, or 9 mM) using 0.1% FA. In addition, 3 mM oxalic acid with no FA was tested (\*). All conditions use 80% acetonitrile with 20% water. Material extracted was CDC QC material lot# D1814.

**SUPPLEMENTAL TABLES:**

Supplemental Table 1. Diseases and second-tier biomarkers of interest

| <b>Disease</b>                                                 | <b>Biomarkers</b>                                                                      |
|----------------------------------------------------------------|----------------------------------------------------------------------------------------|
| Maple syrup urine disease <sup>a</sup>                         | Leu, Ile, alle, and Val <sup>1</sup>                                                   |
| Homocystinuria <sup>a</sup>                                    | t-Hcy <sup>2</sup>                                                                     |
| Methylmalonic academia (Methylmalonyl-CoA mutase) <sup>a</sup> | MMA, t-Hcy, and MCA can be informative <sup>3</sup>                                    |
| Methylmalonic academia (cobalamin disorders) <sup>a</sup>      | MMA, t-Hcy, and MCA can be informative <sup>3</sup>                                    |
| Propionic acidemia <sup>a</sup>                                | MCA <sup>3</sup>                                                                       |
| Isovaleric acidemia <sup>a</sup>                               | Isovalerylcarnitine <sup>4</sup>                                                       |
| Glutaric acidemia type 1 <sup>a</sup>                          | 3-HGA and GA <sup>5</sup>                                                              |
| Adrenoleukodystrophy <sup>a</sup>                              | LPC 26:0 <sup>6</sup>                                                                  |
| Congenital adrenal hyperplasia <sup>a</sup>                    | 17-OHP, 21-deoxycortisol, 11-deoxycortisol, cortisol, and androstenedione <sup>7</sup> |
| Pompe disease <sup>b</sup>                                     | (CRE/CRN)/(acid alpha-glucosidase) ratio <sup>8</sup>                                  |
| Malonic Acidemia                                               | MAL <sup>9</sup>                                                                       |
| Glutaric acidemia type 2 <sup>b</sup>                          | GA, MSA, EMA, and 2-HGA <sup>10</sup>                                                  |
| Short-chain acyl-CoA dehydrogenase deficiency <sup>b</sup>     | EMA and MSA <sup>11</sup>                                                              |
| Guanidinoacetate methyltransferase deficiency                  | GUAC <sup>12</sup>                                                                     |
| Ornithine transcarbamylase deficiency <sup>c</sup>             | OA <sup>13</sup>                                                                       |
| Krabbe                                                         | Psychosine <sup>14</sup>                                                               |

<sup>a</sup>Part of recommended uniform screening panel primary conditions

<sup>b</sup>Part of recommended uniform screening panel secondary conditions

<sup>c</sup>Usefulness of biomarker questionable in DBS

Superscript numbers are citations where these biomarkers are used or discovered, see references at the end of supplemental material

Supplemental Table 2 Part 1. Manufacturer information for chemicals

| Study Analyte Information: Unlabeled and labeled |                            |                                                                 |                            |
|--------------------------------------------------|----------------------------|-----------------------------------------------------------------|----------------------------|
| Unlabeled Chemical, Manufacturer                 | Catalog Number: Lot Number | Labeled Chemical, Manufacturer                                  | Catalog Number: Lot Number |
| Methylmalonic acid (MMA), Sigma                  | MS4058:STBFS304V           | MMA-D <sub>3</sub> , Cambridge Isotope Laboratories, Inc. (CIL) | DLM-387:I-21371            |
| Ethylmalonic acid (EMA), Sigma                   | 102687:BCCB4912            | EMA-D <sub>3</sub> , CIL                                        | DLM-6013:PR-28264          |
| Malonic acid (MA), Sigma                         | M1296:WXBC1802V            | MA- <sup>13</sup> C <sub>3</sub> , CIL                          | CLM-6123:PR-31412          |
| Methylcitric acid (MCA), C/D/N Isotopes          | X-4176:DE-209              | MCA-D <sub>3</sub> , C/D/N isotopes                             | D-4162:DE-268              |
| Alloisoleucine (alle), Sigma                     | I8754:BCBX0375             | alle-D <sub>10</sub> , CIL                                      | DLM-1505:PR-17413B         |
| Isoleucine (Ile), Sigma                          | I2752:SLCG1332             | Ile-D <sub>10</sub> , <sup>15</sup> N, CIL                      | DNLM-7325:PR-25770         |
| Leucine (Leu), Sigma                             | L8000:BCBV3850             | Leu-D <sub>3</sub> , CIL                                        | DLM-1259:PR-29679B         |
| Valine (Val), Sigma                              | V0500:SLBT4145             | Val-D <sub>3</sub> , CIL                                        | DLM-488:PR-22504           |
| Creatine (CRE), Sigma                            | C0780:BCBZ3033             | CRE-D <sub>3</sub> , CIL                                        | DLM-1302                   |
| DL-Homocystine (Hcy), Sigma                      | H0501:127K0773V            | Hcy-D <sub>3</sub> , CIL                                        | DLM-3619:PR-26158          |
| Guanidinoacetic acid (GUAC), Sigma               | G11608:MKCJ7552            | GUAC- <sup>13</sup> C <sub>2</sub> , <sup>15</sup> N, CIL       | CNLM-8300                  |
| Creatinine (CRN), Sigma                          | C4255:SLBW4791             | CRN-D <sub>3</sub> , CIL                                        | DLM-3653                   |
| Orotic acid (OA), Sigma                          | O2750:MKCK0782             | OA- <sup>15</sup> N <sub>2</sub> , CIL                          | NLM-1048:PR-26650          |
| 3-Hydroxyglutaric acid (3-HGA), Sigma            | 04725:BCBW6359             | 3-HGA-D <sub>3</sub> , CIL                                      | D-6391:V-129               |
| 2-Hydroxyglutaric acid (2-HGA), Sigma            | 61313:BCBZ4748             | 2-HGA- <sup>13</sup> C <sub>5</sub> , Sigma                     | 80559:BCCC7143             |
| Lysophosphatidylcholine (LPC) 20:0, Avanti       | 855777P:200LPC-30          | LPC 20:0-D <sub>4</sub> , CIL                                   | DLM-10520:PR-29690         |
| LPC 22:0, Avanti                                 | 855779P:220LPC-18          | LPC 22:0-D <sub>4</sub> , CIL                                   | DLM-10500:PR-29619         |
| LPC 24:0, CIL                                    | ULM-10495:PR-29619         | LPC 24:0-D <sub>4</sub> , CIL                                   | DLM-10497:PR-29620         |
| LPC 26:0, CIL                                    | ULM-9791:PR-27475          | LPC 26:0-D <sub>4</sub> , CIL                                   | DLM-10501:PR-29618         |



Supplemental Table 2 Part 2. Manufacturer information for chemicals

| Attempted Analyte Information: Unlabeled and labeled                     |                            |                                          |                                 |
|--------------------------------------------------------------------------|----------------------------|------------------------------------------|---------------------------------|
| Unlabeled Chemical, Manufacturer                                         | Catalog Number: Lot Number | Labeled Chemical, Manufacturer           | Catalog Number: Lot Number      |
| Glutaric acid (GA), Sigma                                                | G3407:STBF5476V            | GA-D <sub>4</sub> , CIL                  | DLM-3106:PR-30114               |
| Methylsuccinic acid (MSA), Sigma                                         | M81209:53265               | MSA-D <sub>6</sub> , CIL                 | DLM-2960:V-610                  |
| Isovalerylcarnitine, CIL                                                 | ULM-4697:PR-30290          | Isovalerylcarnitine-D <sub>9</sub> , CIL | DLM-3974:PR-27967               |
| 21-Deoxycortisol, Sigma                                                  | P9521                      | 21-Deoxycortisol-D <sub>8</sub> , CIL    | DLM-8305:PR-25872               |
| 11-Deoxycortisol, Sigma                                                  | R0500                      | 11-Deoxycortisol-D <sub>2</sub> , CIL    | DLM-7209:I-22071A               |
| Cortisol, Sigma                                                          | H0888                      | Cortisol-D <sub>4</sub> , CIL            | DLM-2218:PR-20446               |
| Androstenedione, CIL                                                     | ULM-8472-0                 | Androstenedione, CIL                     | DLM-7976:PR-25180               |
| 17- $\alpha$ -hydroxyprogesterone (17-OHP), Sigma                        | H5752                      | 17-OHP-D <sub>8</sub> , CIL              | DLM-6598:I-19002                |
|                                                                          |                            | Psychosine-D <sub>5</sub> , Avanti       | 330714W-1EA:<br>330714W-1ML-010 |
| Interferents and other chemicals                                         |                            |                                          |                                 |
| Chemical, Manufacturer                                                   |                            | Catalog Number: Lot Number               |                                 |
| Succinic acid, Sigma                                                     |                            | S3674:SLBX6330                           |                                 |
| Trans-hydroxyproline, Sigma                                              |                            | H54409:MKCL1320                          |                                 |
| pivaloyl-L-carnitine HCl, Dr. Ten Brick                                  |                            | pivaloyl-L-carnitine.HCl                 |                                 |
| (D,L)-2-methylbutyryl-L-carnitine HCl, Dr. Ten Brick*                    |                            | (D,L)-2-methylbutyryl-L-carnitine.HCl    |                                 |
| Deoxycorticosterone, Sigma                                               |                            | D6875:SLCC6035                           |                                 |
| 17-Deoxycortisol, Sigma                                                  |                            | 27840:BCCB3706                           |                                 |
| DL-dithiothreitol (DTT), Sigma                                           |                            | 43819:BCCB7858                           |                                 |
| tris(2-carboxyethyl)phosphine (TCEP), EMD Millipore Corp.                |                            | 580567:3467213                           |                                 |
| Oxalic acid, Sigma                                                       |                            | 241172                                   |                                 |
| 0.25 N sodium hydroxide, Fisher                                          |                            | SS272-1                                  |                                 |
| LC/MS grade water, Fisher                                                |                            | W6-4                                     |                                 |
| LC/MS grade acetonitrile (ACN), Fisher                                   |                            | A955-4                                   |                                 |
| LC/MS grade formic acid (FA), Fisher                                     |                            | A117-50                                  |                                 |
| Ammonium formate (AmFA), Sigma                                           |                            | 798568:MKCM2018                          |                                 |
| Blood bank saline isotonic solution 0.9% w/v (saline), Thermo Scientific |                            | 23-062-125                               |                                 |

\* Dr. Ten Brick, Amsterdam University Medical Centers, Department of Clinical Chemistry

Supplemental Table 3. Enrichment of every DBS level made for validation

| Chemical | Stock solvent | Level 1 ( $\mu\text{M}$ ) | Level 2 ( $\mu\text{M}$ ) | Level 3 ( $\mu\text{M}$ ) | Level 4 ( $\mu\text{M}$ ) | Level 5 ( $\mu\text{M}$ ) | Level 6 ( $\mu\text{M}$ ) | Level 7 ( $\mu\text{M}$ ) | Level 8 ( $\mu\text{M}$ ) | Level 9 ( $\mu\text{M}$ ) | Level 10 ( $\mu\text{M}$ ) | Level 11 ( $\mu\text{M}$ ) |
|----------|---------------|---------------------------|---------------------------|---------------------------|---------------------------|---------------------------|---------------------------|---------------------------|---------------------------|---------------------------|----------------------------|----------------------------|
| CRE      | water         | 0                         | 7                         | 11.9                      | 20.2                      | 34.4                      | 58.5                      | 99.4                      | 169                       | 287                       | 488                        | 830                        |
| GUAC     | water         | 0                         | 0.2                       | 0.34                      | 0.58                      | 0.98                      | 1.67                      | 2.84                      | 4.83                      | 8.21                      | 14                         | 23.7                       |
| CRN      | water         | 0                         | 2                         | 3.4                       | 5.78                      | 9.83                      | 16.7                      | 28.4                      | 48.3                      | 82.1                      | 140                        | 237                        |
| OA       | 0.1 N NaOH    | 0                         | 0.5                       | 0.85                      | 1.45                      | 2.46                      | 4.18                      | 7.1                       | 12.1                      | 20.5                      | 34.9                       | 59.3                       |
| 3-HGA    | water         | 0                         | 0.15                      | 0.26                      | 0.43                      | 0.74                      | 1.25                      | 2.13                      | 3.62                      | 6.16                      | 10.5                       | 17.8                       |
| 2-HGA    | water         | 0                         | 0.8                       | 1.36                      | 2.31                      | 3.93                      | 6.68                      | 11.3                      | 19.3                      | 32.8                      | 55.8                       | 94.9                       |
| LPC 20:0 | methanol      | 0                         | 0.025                     | 0.043                     | 0.072                     | 0.123                     | 0.209                     | 0.355                     | 0.603                     | 1.03                      | 1.74                       | 2.97                       |
| LPC 22:0 | methanol      | 0                         | 0.025                     | 0.043                     | 0.072                     | 0.123                     | 0.209                     | 0.355                     | 0.603                     | 1.03                      | 1.74                       | 2.97                       |
| LPC 24:0 | methanol      | 0                         | 0.025                     | 0.043                     | 0.072                     | 0.123                     | 0.209                     | 0.355                     | 0.603                     | 1.03                      | 1.74                       | 2.97                       |
| LPC 26:0 | methanol      | 0                         | 0.025                     | 0.043                     | 0.072                     | 0.123                     | 0.209                     | 0.355                     | 0.603                     | 1.03                      | 1.74                       | 2.97                       |
| MMA      | water         | 0                         | 0.5                       | 0.85                      | 1.45                      | 2.46                      | 4.18                      | 7.1                       | 12.1                      | 20.5                      | 34.9                       | 59.3                       |
| EMA      | water         | 0                         | 0.5                       | 0.85                      | 1.45                      | 2.46                      | 4.18                      | 7.1                       | 12.1                      | 20.5                      | 34.9                       | 59.3                       |
| MA       | water         | 0                         | 1                         | 1.7                       | 2.89                      | 4.91                      | 8.35                      | 14.2                      | 24.1                      | 41                        | 69.8                       | 119                        |
| MCA      | water         | 0                         | 0.25                      | 0.43                      | 0.72                      | 1.23                      | 2.09                      | 3.55                      | 6.03                      | 10.3                      | 17.4                       | 29.7                       |
| alle     | water         | 0                         | 0.11                      | 0.19                      | 0.32                      | 0.54                      | 0.92                      | 1.56                      | 2.66                      | 4.51                      | 7.67                       | 13                         |
| Ile      | water         | 0                         | 7                         | 11.9                      | 20.2                      | 34.4                      | 58.5                      | 99.4                      | 169                       | 287                       | 488                        | 830                        |
| Leu      | water         | 0                         | 7                         | 11.9                      | 20.2                      | 34.4                      | 58.5                      | 99.4                      | 169                       | 287                       | 488                        | 830                        |
| Val      | water         | 0                         | 7                         | 11.9                      | 20.2                      | 34.4                      | 58.5                      | 99.4                      | 169                       | 287                       | 488                        | 830                        |
| Hcy*     | 0.1 N NaOH    | 0                         | 1                         | 1.7                       | 2.89                      | 4.91                      | 8.35                      | 14.2                      | 24.1                      | 41                        | 69.8                       | 119                        |

\*dimer enriched. Values shown are monomer value

Supplemental Table 4. Multiple reaction monitoring table with retention times for final method

| Compound                                             | Transition (ion/fragment m/z) | Dwell time (sec) | Ionization mode | Collision energy (eV) | Cone voltage (V) | Retention time (min) |
|------------------------------------------------------|-------------------------------|------------------|-----------------|-----------------------|------------------|----------------------|
| CRN                                                  | 114/44                        | 0.075            | ES+             | 12                    | 30               | 10.3                 |
| CRN-D <sub>3</sub>                                   | 117/47                        | 0.075            | ES+             | 12                    | 30               | 10.3                 |
| Val                                                  | 118/72                        | 0.01             | ES+             | 10                    | 20               | 8.7                  |
| Val-D <sub>8</sub>                                   | 126/80                        | 0.01             | ES+             | 10                    | 20               | 8.7                  |
| t-Hcy                                                | 136/90                        | 0.01             | ES+             | 10                    | 20               | 8.5                  |
| t-Hcy-D <sub>4</sub>                                 | 140/94                        | 0.01             | ES+             | 10                    | 20               | 8.5                  |
| GUAC                                                 | 118/76                        | 0.052            | ES+             | 11                    | 10               | 9.6                  |
| GUAC- <sup>13</sup> C <sub>2</sub> - <sup>15</sup> N | 121/79                        | 0.052            | ES+             | 11                    | 10               | 9.6                  |
| CRE- <sup>13</sup> C <sub>1</sub> #                  | 133/91                        | 0.052            | ES+             | 12                    | 20               | 9.3                  |
| CRE- <sup>13</sup> C <sub>1</sub> -D <sub>3</sub> #  | 136/94                        | 0.052            | ES+             | 12                    | 20               | 9.3                  |
| alle and Ile                                         | 132/69                        | 0.009            | ES+             | 20                    | 25               | 7.2 and 7.5          |
| alle-D <sub>10</sub>                                 | 142/78                        | 0.009            | ES+             | 20                    | 25               | 7.2                  |
| Ile-D <sub>10</sub> - <sup>15</sup> N                | 143/78                        | 0.009            | ES+             | 20                    | 25               | 7.5                  |
| Leu                                                  | 132/86                        | 0.009            | ES+             | 8                     | 22               | 6.8                  |
| Leu-D <sub>3</sub>                                   | 135/89                        | 0.009            | ES+             | 8                     | 22               | 6.8                  |
| LPC 20:0                                             | 552.7/104.1                   | 0.038            | ES+             | 28                    | 55               | 3.3                  |
| LPC 20:0-D <sub>4</sub>                              | 556.7/104.1                   | 0.038            | ES+             | 28                    | 55               | 3.3                  |
| LPC 22:0                                             | 580.7/104.1                   | 0.038            | ES+             | 28                    | 55               | 3.2                  |
| LPC 22:0-D <sub>4</sub>                              | 584.7/104.1                   | 0.038            | ES+             | 28                    | 55               | 3.2                  |
| LPC 24:0                                             | 608.7/104.1                   | 0.038            | ES+             | 28                    | 55               | 3.1                  |
| LPC 24:0-D <sub>4</sub>                              | 612.7/104.1                   | 0.038            | ES+             | 28                    | 55               | 3.1                  |
| LPC 26:0                                             | 636.7/104.1                   | 0.038            | ES+             | 28                    | 55               | 3.1                  |
| LPC 26:0-D <sub>4</sub>                              | 640.7/104.1                   | 0.038            | ES+             | 28                    | 55               | 3.1                  |
| MA                                                   | 103/59                        | 0.01             | ES-             | 8                     | 15               | 1.2                  |
| MA- <sup>13</sup> C <sub>3</sub>                     | 106/61                        | 0.01             | ES-             | 8                     | 15               | 1.2                  |
| MMA                                                  | 117/73                        | 0.01             | ES-             | 8                     | 15               | 1.2                  |
| MMA-D <sub>3</sub>                                   | 120/75.8                      | 0.01             | ES-             | 8                     | 15               | 1.2                  |
| EMA                                                  | 131/87                        | 0.01             | ES-             | 10                    | 20               | 1.1                  |
| EMA-D <sub>3</sub>                                   | 134/90                        | 0.01             | ES-             | 10                    | 20               | 1.1                  |
| 2-HGA                                                | 147/85                        | 0.018            | ES-             | 8                     | 25               | 2.0                  |
| 2-HGA- <sup>13</sup> C <sub>5</sub>                  | 152/89                        | 0.018            | ES-             | 8                     | 25               | 2.0                  |
| 3-HGA                                                | 147/85                        | 0.018            | ES-             | 8                     | 22               | 1.9                  |
| 3-HGA-D <sub>5</sub>                                 | 152/89                        | 0.018            | ES-             | 8                     | 22               | 1.9                  |
| OA                                                   | 155/111                       | 0.018            | ES-             | 10                    | 20               | 2.1                  |
| OA- <sup>15</sup> N <sub>2</sub>                     | 157/113                       | 0.018            | ES-             | 10                    | 20               | 2.1                  |
| MCA                                                  | 205/125                       | 0.1              | ES-             | 12                    | 10               | 1.5* and 2.1         |
| MCA-D <sub>3</sub>                                   | 208/128                       | 0.1              | ES-             | 12                    | 10               | 1.5* and 2.1         |

\*time used for quantification of analyte

#unlabeled creatine was so intense that the endogenous <sup>13</sup>C<sub>1</sub> isotope was used for quantification. Internal standard is only labeled for deuterium.

Supplemental Table 5. Multiple reaction monitoring transitions with retention times for attempted biomarkers

| Compound                                  | Transition<br>(ion/fragment<br>m/z) | Dwell time<br>(sec) | Ionization<br>mode | Collision<br>energy (eV) | Cone voltage<br>(V) | Retention time<br>(min) |
|-------------------------------------------|-------------------------------------|---------------------|--------------------|--------------------------|---------------------|-------------------------|
| Isovalerylcarnitine                       | 246/85                              | 0.052               | ES+                | 20                       | 10                  | 5.9                     |
| Isovalerylcarnitine-D <sub>9</sub>        | 246/85                              | 0.052               | ES+                | 20                       | 10                  | 5.9                     |
| GA                                        | 131/87                              | 0.006               | ES-                | 10                       | 20                  | 1.4                     |
| GA-D <sub>4</sub>                         | 135/91                              | 0.006               | ES-                | 10                       | 20                  | 1.4                     |
| MSA                                       | 131/87                              | 0.006               | ES-                | 10                       | 20                  | 1.3                     |
| MSA-D <sub>6</sub>                        | 137/93                              | 0.006               | ES-                | 10                       | 20                  | 1.3                     |
| Androstenedione                           | 287.3/97.1                          | 0.003               | ES+                | 24                       | 40                  | 1.1                     |
| Androstenedione-D <sub>7</sub>            | 294.3/100.1                         | 0.003               | ES+                | 24                       | 40                  | 1.1                     |
| 17-OHP                                    | 331.2/97.0                          | 0.003               | ES+                | 45                       | 25                  | 1.2                     |
| 17-OHP-D <sub>8</sub>                     | 339.2/100.1                         | 0.003               | ES+                | 45                       | 25                  | 1.2                     |
| 11-Deoxycortisol                          | 347.2/97.0                          | 0.003               | ES+                | 24                       | 40                  | 1.3                     |
| 11-Deoxycortisol-D <sub>2</sub>           | 349.2/97.0                          | 0.003               | ES+                | 24                       | 40                  | 1.3                     |
| 21-Deoxycortisol                          | 347.2/121.0                         | 0.003               | ES+                | 22                       | 35                  | 1.2                     |
| 21-Deoxycortisol-D <sub>8</sub>           | 355.2/125.0                         | 0.003               | ES+                | 22                       | 35                  | 1.2                     |
| Cortisol                                  | 363.2/121.0                         | 0.003               | ES+                | 30                       | 24                  | 1.5                     |
| Cortisol-D <sub>4</sub>                   | 367.2/121.0                         | 0.003               | ES+                | 30                       | 24                  | 1.5                     |
| Psychosine transition<br>1                | 462.5/282.5                         | 0.003               | ES+                | 20                       | 20                  | Elutes after run        |
| Psychosine-D <sub>5</sub><br>transition 1 | 467.5/287.5                         | 0.003               | ES+                | 20                       | 20                  | Elutes after run        |
| Psychosine transition<br>2                | 462.5/264.5                         | 0.003               | ES+                | 18                       | 20                  | Elutes after run        |
| Psychosine-D <sub>5</sub><br>transition 2 | 467.5/269.5                         | 0.003               | ES+                | 18                       | 20                  | Elutes after run        |

Supplemental Table 6. Concentration of biomarker spikes, relative to DBS volume, for accuracy analysis

| <b>Chemical</b> | <b>Zero enrichment (μM)</b> | <b>Low enrichment (μM)</b> | <b>Medium enrichment (μM)</b> | <b>High enrichment (μM)</b> |
|-----------------|-----------------------------|----------------------------|-------------------------------|-----------------------------|
| CRE             | 0                           | 34.4                       | 99.4                          | 488                         |
| GUAC            | 0                           | 0.58                       | 2.84                          | 14                          |
| CRN             | 0                           | 9.83                       | 28.4                          | 140                         |
| OA              | 0                           | 1.45                       | 7.1                           | 34.9                        |
| 3-HGA           | 0                           | 0.43                       | 2.13                          | 10.5                        |
| 2-HGA           | 0                           | 2.31                       | 11.4                          | 55.8                        |
| LPC 20:0        | 0                           | 0.07                       | 0.35                          | 1.74                        |
| LPC 22:0        | 0                           | 0.07                       | 0.35                          | 1.74                        |
| LPC 24:0        | 0                           | 0.07                       | 0.35                          | 1.74                        |
| LPC 26:0        | 0                           | 0.07                       | 0.35                          | 1.74                        |
| MMA             | 0                           | 1.45                       | 7.1                           | 34.9                        |
| EMA             | 0                           | 1.45                       | 7.1                           | 34.9                        |
| MA              | 0                           | 2.89                       | 14.2                          | 69.8                        |
| MCA             | 0                           | 0.72                       | 3.55                          | 17.4                        |
| alle            | 0                           | 0.54                       | 1.56                          | 7.67                        |
| Ile             | 0                           | 34.4                       | 99.4                          | 488                         |
| Leu             | 0                           | 34.4                       | 99.4                          | 488                         |
| Val             | 0                           | 34.4                       | 99.4                          | 488                         |
| Hcy*            | 0                           | 2.89                       | 14.2                          | 69.8                        |

\*dimer enriched. Values shown are monomer values

Supplemental Table 7. Separation of biomarker and interferents

| <b>Biomarker/Interferent</b>                                                | <b>Separated?</b>                      |
|-----------------------------------------------------------------------------|----------------------------------------|
| MMA/succinic acid <sup>3</sup>                                              | Yes                                    |
| LPC 26:0/unknown interferent <sup>6</sup>                                   | Yes                                    |
| 3-HGA/2-HGA <sup>15</sup>                                                   | Yes                                    |
| Leu/Ile/alle/hydroxyproline <sup>1</sup>                                    | Yes                                    |
| GA/MSA                                                                      | No                                     |
| EMA/(GA and MSA)                                                            | Yes                                    |
| GUAC/unknown interferent <sup>12</sup>                                      | Unknown<br>interferent not<br>observed |
| Isovalerylcarnitine/pivaloylcarnitine/2-methylbutyrylcarnitine <sup>4</sup> | No                                     |
| 21-Deoxycortisol/11-deoxycortisol <sup>16</sup> /17-deoxycortisol           | No                                     |
| 17-OHP/deoxycorticosterone <sup>7</sup>                                     | No                                     |

Superscript numbers are references where interferents are documented

Supplemental Table 8 Part 1. Biomarker recovery and accuracy

| Compound | Matrix                     | Enrichment level | Accuracy (%) | Recovery (%) | Accuracy corrected recovery (%) |
|----------|----------------------------|------------------|--------------|--------------|---------------------------------|
| CRN      | Level 1 DBS*               | Low              | 103          |              |                                 |
|          |                            | Medium           | 104          |              |                                 |
|          |                            | High             | 100          | 78           | 78                              |
|          | MSUD-PKU DBS QC Lot# A2013 | Low              | 102          |              |                                 |
|          |                            | Medium           | 104          |              |                                 |
|          |                            | High             | 101          |              |                                 |
| Val      | Level 1 DBS*               | Low              | 103          |              |                                 |
|          |                            | Medium           | 92           |              |                                 |
|          |                            | High             | 93           | 62           | 69                              |
|          | MSUD-PKU DBS QC Lot# A2013 | Low              | 92           |              |                                 |
|          |                            | Medium           | 92           |              |                                 |
|          |                            | High             | 91           |              |                                 |
| t-Hcy    | Level 1 DBS*               | Low              | 100          |              |                                 |
|          |                            | Medium           | 99           |              |                                 |
|          |                            | High             | 99           | 26           | 27                              |
|          | MSUD-PKU DBS QC Lot# A2013 | Low              | 97           |              |                                 |
|          |                            | Medium           | 97           |              |                                 |
|          |                            | High             | 98           |              |                                 |
| GUAC     | Level 1 DBS*               | Low              | 91           |              |                                 |
|          |                            | Medium           | 93           |              |                                 |
|          |                            | High             | 93           | 73           | 80                              |
|          | MSUD-PKU DBS QC Lot# A2013 | Low              | 89           |              |                                 |
|          |                            | Medium           | 94           |              |                                 |
|          |                            | High             | 93           |              |                                 |
| Leu      | Level 1 DBS*               | Low              | 86           |              |                                 |
|          |                            | Medium           | 89           |              |                                 |
|          |                            | High             | 89           | 64           | 75                              |
|          | MSUD-PKU DBS QC Lot# A2013 | Low              | 86           |              |                                 |
|          |                            | Medium           | 90           |              |                                 |
|          |                            | High             | 89           |              |                                 |
| CRE      | Level 1 DBS*               | Low              | 101          |              |                                 |
|          |                            | Medium           | 113          |              |                                 |
|          |                            | High             | 113          | 81           | 68                              |
|          | MSUD-PKU DBS QC Lot# A2013 | Low              | 110          |              |                                 |
|          |                            | Medium           | 118          |              |                                 |
|          |                            | High             | 115          |              |                                 |

\*DBS made in this study, unenriched

Supplemental Table 8 Part 2. Biomarker recovery and accuracy

| Compound | Matrix                     | Enrichment level | Accuracy (%) | Recovery (%) | Accuracy corrected recovery (%) |
|----------|----------------------------|------------------|--------------|--------------|---------------------------------|
| MA       | Level 1 DBS*               | Low              | 86           |              |                                 |
|          |                            | Medium           | 85           |              |                                 |
|          |                            | High             | 84           | 58           | 74                              |
|          | MSUD-PKU DBS QC Lot# A2013 | Low              | 95           |              |                                 |
|          |                            | Medium           | 90           |              |                                 |
|          |                            | High             | 85           |              |                                 |
| MMA      | Level 1 DBS*               | Low              | 109          |              |                                 |
|          |                            | Medium           | 108          |              |                                 |
|          |                            | High             | 104          | 71           | 67                              |
|          | MSUD-PKU DBS QC Lot# A2013 | Low              | 103          |              |                                 |
|          |                            | Medium           | 107          |              |                                 |
|          |                            | High             | 104          |              |                                 |
| EMA      | Level 1 DBS*               | Low              | 87           |              |                                 |
|          |                            | Medium           | 91           |              |                                 |
|          |                            | High             | 90           | 62           | 72                              |
|          | MSUD-PKU DBS QC Lot# A2013 | Low              | 89           |              |                                 |
|          |                            | Medium           | 92           |              |                                 |
|          |                            | High             | 91           |              |                                 |
| 3-HGA    | Level 1 DBS*               | Low              | 77           |              |                                 |
|          |                            | Medium           | 78           |              |                                 |
|          |                            | High             | 79           | 52           | 73                              |
|          | MSUD-PKU DBS QC Lot# A2013 | Low              | 80           |              |                                 |
|          |                            | Medium           | 78           |              |                                 |
|          |                            | High             | 78           |              |                                 |
| 2-HGA    | Level 1 DBS*               | Low              | 80           |              |                                 |
|          |                            | Medium           | 88           |              |                                 |
|          |                            | High             | 88           | 60           | 72                              |
|          | MSUD-PKU DBS QC Lot# A2013 | Low              | 86           |              |                                 |
|          |                            | Medium           | 90           |              |                                 |
|          |                            | High             | 88           |              |                                 |
| OA       | Level 1 DBS*               | Low              | 93           |              |                                 |
|          |                            | Medium           | 94           |              |                                 |
|          |                            | High             | 93           | 70           | 77                              |
|          | MSUD-PKU DBS QC Lot# A2013 | Low              | 95           |              |                                 |
|          |                            | Medium           | 94           |              |                                 |
|          |                            | High             | 93           |              |                                 |

\*DBS made in this study, unenriched



Supplemental Table 8 Part 3. Biomarker recovery and accuracy

| Compound | Matrix                     | Enrichment level | Accuracy (%) | Recovery (%) | Accuracy corrected recovery (%) |
|----------|----------------------------|------------------|--------------|--------------|---------------------------------|
| MCA      | Level 1 DBS*               | Low              | 89           |              |                                 |
|          |                            | Medium           | 91           |              |                                 |
|          |                            | High             | 92           | 60           | 68                              |
|          | MSUD-PKU DBS QC Lot# A2013 | Low              | 90           |              |                                 |
|          |                            | Medium           | 91           |              |                                 |
|          |                            | High             | 92           |              |                                 |
| LPC 20:0 | Level 1 DBS*               | Low              | 103          |              |                                 |
|          |                            | Medium           | 105          |              |                                 |
|          |                            | High             | 106          | 92           | 86                              |
|          | MSUD-PKU DBS QC Lot# A2013 | Low              | 103          |              |                                 |
|          |                            | Medium           | 105          |              |                                 |
|          |                            | High             | 106          |              |                                 |
| LPC 22:0 | Level 1 DBS*               | Low              | 91           |              |                                 |
|          |                            | Medium           | 106          |              |                                 |
|          |                            | High             | 101          | 105          | 104                             |
|          | MSUD-PKU DBS QC Lot# A2013 | Low              | 93           |              |                                 |
|          |                            | Medium           | 108          |              |                                 |
|          |                            | High             | 102          |              |                                 |
| LPC 24:0 | Level 1 DBS*               | Low              | 86           |              |                                 |
|          |                            | Medium           | 105          |              |                                 |
|          |                            | High             | 104          | 110          | 106                             |
|          | MSUD-PKU DBS QC Lot# A2013 | Low              | 88           |              |                                 |
|          |                            | Medium           | 105          |              |                                 |
|          |                            | High             | 104          |              |                                 |
| LPC 26:0 | Level 1 DBS*               | Low              | 86           |              |                                 |
|          |                            | Medium           | 110          |              |                                 |
|          |                            | High             | 104          | 106          | 102                             |
|          | MSUD-PKU DBS QC Lot# A2013 | Low              | 87           |              |                                 |
|          |                            | Medium           | 112          |              |                                 |
|          |                            | High             | 105          |              |                                 |
| Ile      | Level 1 DBS*               | Low              | 97           |              |                                 |
|          |                            | Medium           | 100          |              |                                 |
|          |                            | High             | 98           | 75           | 77                              |
|          | MSUD-PKU DBS QC Lot# A2013 | Low              | 98           |              |                                 |
|          |                            | Medium           | 101          |              |                                 |
|          |                            | High             | 99           |              |                                 |
| alle     | Level 1 DBS*               | Low              | 105          |              |                                 |
|          |                            | Medium           | 101          |              |                                 |
|          |                            | High             | 107          | 66           | 59                              |
|          | MSUD-PKU DBS QC Lot# A2013 | Low              | 102          |              |                                 |
|          |                            | Medium           | 100          |              |                                 |

|  |  |      |     |  |  |
|--|--|------|-----|--|--|
|  |  | High | 103 |  |  |
|--|--|------|-----|--|--|

\*DBS made in this study, unenriched

Supplemental Table 9 Part 1. Biomarker imprecision and reproducibility results broken down by enrichment level

| Compound | Level | Total Relative Standard Deviation (%) | Reproducibility (%) |
|----------|-------|---------------------------------------|---------------------|
| CRN      | 4     | 8                                     | 7                   |
|          | 7     | 9                                     | 9                   |
|          | 10    | 10                                    | 10                  |
| Val      | 4     | 16                                    | 9                   |
|          | 7     | 15                                    | 11                  |
|          | 10    | 15                                    | 13                  |
| t-Hcy    | 4     | 19                                    | 12                  |
|          | 7     | 20                                    | 18                  |
|          | 10    | 22                                    | 18                  |
| GUAC     | 4     | 6                                     | 0                   |
|          | 7     | 6                                     | 3                   |
|          | 10    | 7                                     | 4                   |
| Leu      | 4     | 6                                     | 2                   |
|          | 7     | 5                                     | 2                   |
|          | 10    | 6                                     | 3                   |
| CRE      | 4     | 6                                     | 3                   |
|          | 7     | 6                                     | 5                   |
|          | 10    | 7                                     | 7                   |
| MA       | 4     | 10                                    | 6                   |
|          | 7     | 5                                     | 1                   |
|          | 10    | 6                                     | 3                   |
| MMA      | 4     | 10                                    | 2                   |
|          | 7     | 8                                     | 2                   |
|          | 10    | 8                                     | 5                   |
| EMA      | 4     | 7                                     | 0                   |
|          | 7     | 5                                     | 2                   |
|          | 10    | 6                                     | 2                   |
| 3-HGA    | 4     | 15                                    | 1                   |
|          | 7     | 7                                     | 0                   |
|          | 10    | 7                                     | 4                   |
| 2-HGA    | 4     | 5                                     | 2                   |
|          | 7     | 5                                     | 2                   |
|          | 10    | 6                                     | 3                   |
| OA       | 4     | 6                                     | 1                   |
|          | 7     | 5                                     | 3                   |
|          | 10    | 6                                     | 3                   |
| MCA      | 4     | 6                                     | 0                   |
|          | 7     | 5                                     | 3                   |

|          |    |   |   |
|----------|----|---|---|
|          | 10 | 6 | 5 |
| LPC 20:0 | 4  | 9 | 2 |
|          | 7  | 7 | 0 |
|          | 10 | 9 | 4 |

Supplemental Table 9 Part 2. Biomarker imprecision and reproducibility results broken down by enrichment level

| Compound | Level | Total Relative Standard Deviation (%) | Reproducibility (%) |
|----------|-------|---------------------------------------|---------------------|
| LPC 22:0 | 4     | 8                                     | 1                   |
|          | 7     | 6                                     | 3                   |
|          | 10    | 8                                     | 6                   |
| LPC 24:0 | 4     | 8                                     | 1                   |
|          | 7     | 9                                     | 6                   |
|          | 10    | 10                                    | 6                   |
| LPC 26:0 | 4     | 16                                    | 15                  |
|          | 7     | 13                                    | 6                   |
|          | 10    | 12                                    | 1                   |
| Ile      | 4     | 11                                    | 7                   |
|          | 7     | 11                                    | 3                   |
|          | 10    | 10                                    | 2                   |
| alle     | 4     | 12                                    | 9                   |
|          | 7     | 11                                    | 7                   |
|          | 10    | 11                                    | 4                   |

Supplemental Table 10 Part I. Ruggedness with biomarker concentrations over different treatments and limits

| Condition                   | Level (DBS) | CRE ( $\mu\text{M}$ ) | GUAC ( $\mu\text{M}$ ) | CRN ( $\mu\text{M}$ ) | OA ( $\mu\text{M}$ ) | 3-HGA ( $\mu\text{M}$ ) | 2-HGA ( $\mu\text{M}$ ) | LPC 20:0 ( $\mu\text{M}$ ) | LPC 22:0 ( $\mu\text{M}$ ) | LPC 24:0 ( $\mu\text{M}$ ) | LPC 26:0 ( $\mu\text{M}$ ) |
|-----------------------------|-------------|-----------------------|------------------------|-----------------------|----------------------|-------------------------|-------------------------|----------------------------|----------------------------|----------------------------|----------------------------|
| FA +10%                     | 4           | 315                   | 1.03                   | 22.4                  | 0.859                | 0.268                   | 14.8                    | 0.113                      | 0.0986                     | 0.117                      | 0.08                       |
| FA +10%                     | 10          | 669                   | 10.3                   | 127                   | 23.3                 | 5.23                    | 44.9                    | 1.33                       | 1.58                       | 1.72                       | 1.48                       |
| FA -10%                     | 4           | 300                   | 0.99                   | 18.8                  | 0.849                | 0.404                   | 14.1                    | 0.106                      | 0.0888                     | 0.112                      | 0.08                       |
| FA -10%                     | 10          | 732                   | 11.1                   | 114                   | 25.3                 | 6.2                     | 48.5                    | 1.41                       | 1.7                        | 1.86                       | 1.55                       |
| AmFA +10%                   | 4           | 252                   | 0.894                  | 19                    | 0.765                | 0.458                   | 12.6                    | 0.0907                     | 0.082                      | 0.091                      | 0.0733                     |
| AmFA +10%                   | 10          | 617                   | 9.95                   | 112                   | 23.4                 | 5.64                    | 43.7                    | 1.32                       | 1.64                       | 1.71                       | 1.61                       |
| AmFA -10%                   | 4           | 292                   | 0.994                  | 18.5                  | 0.882                | 0.193                   | 14.2                    | 0.102                      | 0.0907                     | 0.104                      | 0.082                      |
| AmFA -10%                   | 10          | 607                   | 9.87                   | 104                   | 23.3                 | 4.91                    | 43.7                    | 1.25                       | 1.55                       | 1.59                       | 1.54                       |
| DTT -10%                    | 4           | 289                   | 0.995                  | 21.4                  | 0.839                | 0.285                   | 13.6                    | 0.105                      | 0.0813                     | 0.108                      | 0.0783                     |
| DTT -10%                    | 10          | 644                   | 10.1                   | 125                   | 22.6                 | 5.41                    | 43.2                    | 1.44                       | 1.66                       | 1.88                       | 1.67                       |
| DTT +10%                    | 4           | 268                   | 0.902                  | 19.8                  | 0.772                | 0.259                   | 12.4                    | 0.1                        | 0.078                      | 0.102                      | 0.0723                     |
| DTT +10%                    | 10          | 672                   | 10.6                   | 131                   | 23.8                 | 5.74                    | 46.1                    | 1.4                        | 1.65                       | 1.88                       | 1.58                       |
| Extraction Temperature 30°C | 4           | 295                   | 0.998                  | 24.5                  | 0.844                | 0.283                   | 13.8                    | 0.118                      | 0.088                      | 0.123                      | 0.083                      |
| Extraction Temperature 30°C | 10          | 670                   | 10.6                   | 133                   | 24.1                 | 5.63                    | 45                      | 1.47                       | 1.63                       | 1.78                       | 1.6                        |
| Column Temperature -10%     | 4           | 296                   | 0.979                  | 20.6                  | 0.797                | 0.332                   | 13.8                    | 0.104                      | 0.089                      | 0.109                      | 0.0836                     |
| Column Temperature -10%     | 10          | 685                   | 10.7                   | 127                   | 24.5                 | 5.93                    | 45.9                    | 1.46                       | 1.77                       | 1.92                       | 1.61                       |
| Column Temperature +10%     | 4           | 287                   | 0.949                  | 18.1                  | 0.791                | 0.339                   | 13.4                    | 0.103                      | 0.0895                     | 0.106                      | 0.08                       |
| Column Temperature +10%     | 10          | 668                   | 10.1                   | 112                   | 23.4                 | 5.6                     | 44.6                    | 1.33                       | 1.59                       | 1.7                        | 1.46                       |
| Lower limit*                | 4           | 234                   | 0.787                  | 16.1                  | 0.676                | 0.181                   | 11.2                    | 0.0786                     | 0.0625                     | 0.0763                     | 0.0403                     |
| Upper limit^                | 4           | 326                   | 1.13                   | 26.3                  | 0.966                | 0.465                   | 15.5                    | 0.135                      | 0.0997                     | 0.127                      | 0.11                       |
| Lower limit*                | 10          | 549                   | 8.84                   | 93.2                  | 20.4                 | 4.69                    | 38.8                    | 1.08                       | 1.26                       | 1.22                       | 0.973                      |
| Upper limit^                | 10          | 816                   | 13.1                   | 174                   | 29.6                 | 7.04                    | 55.3                    | 1.87                       | 2.1                        | 2.3                        | 2.13                       |

\*(Imprecision mean - 3\*SD)

^(Imprecision mean + 3\*SD)

Items in **bold** are outside the specified limits.

Supplemental Table 10 Part 2. Ruggedness with biomarker concentrations over different treatments and limits

| Condition                   | Level (DBS) | MMA (µM)    | EMA (µM) | MA (µM) | MCA (µM) | alle (µM)   | Ile (µM)    | Leu (µM) | Val (µM) | t-Hcy (µM) |
|-----------------------------|-------------|-------------|----------|---------|----------|-------------|-------------|----------|----------|------------|
| FA +10%                     | 4           | <b>1.93</b> | 1.34     | 6.25    | 0.537    | <b>1.12</b> | <b>43.1</b> | 61       | 70.4     | 3.31       |
| FA +10%                     | 10          | 26          | 21.4     | 44.9    | 10.5     | 7.35        | 439         | 357      | 346      | 17.9       |
| FA -10%                     | 4           | 1.53        | 1.17     | 6.12    | 0.531    | 0.856       | 35.5        | 58.1     | 67.4     | 3.34       |
| FA -10%                     | 10          | 28          | 23.1     | 49.1    | 11.6     | 6.69        | 420         | 385      | 371      | 20         |
| AmFA +10%                   | 4           | 1.33        | 1.05     | 4.52    | 0.477    | 0.911       | 35.2        | 53.1     | 74.3     | 3.4        |
| AmFA +10%                   | 10          | 26          | 21.1     | 42.3    | 10.4     | 6.42        | 401         | 350      | 407      | 18.6       |
| AmFA -10%                   | 4           | 1.57        | 1.24     | 4.56    | 0.499    | <b>1.24</b> | 41.1        | 60       | 67.4     | 4.11       |
| AmFA -10%                   | 10          | 25.8        | 21       | 41.1    | 9.92     | <b>8.05</b> | 417         | 352      | 325      | 21.5       |
| DTT -10%                    | 4           | 1.47        | 1.15     | 4.48    | 0.506    | 0.699       | 32.9        | 56       | 90       | 3.3        |
| DTT -10%                    | 10          | 24.5        | 21.1     | 42.8    | 10.5     | 5.28        | 357         | 344      | 466      | 17.9       |
| DTT +10%                    | 4           | 1.38        | 1.07     | 4.29    | 0.468    | 0.662       | 30.4        | 52       | 77.2     | 3.46       |
| DTT +10%                    | 10          | 26.2        | 21.8     | 45.4    | 10.7     | 5.26        | 376         | 359      | 482      | 19.7       |
| Extraction Temperature 30°C | 4           | 1.42        | 1.16     | 4.81    | 0.506    | 0.773       | 29.9        | 56.4     | 85.6     | 4.01       |
| Extraction Temperature 30°C | 10          | 24.7        | 21       | 43.3    | 10.6     | 4.87        | 334         | 350      | 475      | 21.2       |
| Column Temperature -10%     | 4           | 1.53        | 1.13     | 5.54    | 0.525    | 0.91        | 33.8        | 57.1     | 61.4     | 3.61       |
| Column Temperature -10%     | 10          | 26          | 21.8     | 46.4    | 11       | 6.84        | 389         | 365      | 318      | 21.5       |
| Column Temperature +10%     | 4           | 1.78        | 1.19     | 5.61    | 0.49     | 0.934       | 35.9        | 55.4     | 80       | 3.21       |
| Column Temperature +10%     | 10          | 25.2        | 21.2     | 44.6    | 10.5     | 6.49        | 406         | 355      | 424      | 19.6       |
| Lower limit*                | 4           | 0.99        | 0.895    | 3.86    | 0.404    | 0.489       | 21.2        | 45.4     | 36.4     | 1.61       |
| Upper limit^                | 4           | 1.83        | 1.38     | 7.33    | 0.581    | 1.03        | 42.6        | 63.7     | 102      | 5.84       |
| Lower limit*                | 10          | 19.7        | 18.4     | 37.6    | 8.89     | 3.88        | 262         | 303      | 216      | 7.66       |
| Upper limit^                | 10          | 32.8        | 26.3     | 54.3    | 13.1     | 7.52        | 503         | 429      | 565      | 35.7       |

\*(Imprecision mean - 3\*SD)

^(Imprecision mean + 3\*SD)

Items in **bold with a gray background** are outside the specified limits.

Supplemental Table 11 Part I. Stability DBS concentration after different treatments with upper and lower limits

| Treatment                       | Compound  | Level (DBS) | Mean ( $\mu\text{M}$ ) | SD ( $\mu\text{M}$ ) | Upper limit (imprecision mean + 3 x SD) ( $\mu\text{M}$ ) | Lower limit (imprecision mean - 3 x SD) ( $\mu\text{M}$ ) |
|---------------------------------|-----------|-------------|------------------------|----------------------|-----------------------------------------------------------|-----------------------------------------------------------|
| Extract stored for 24 hr at 4°C | CRN       | 4           | 24.4                   | 0.293                | 26.3                                                      | 16.1                                                      |
|                                 |           | 10          | 138                    | 1.99                 | 174                                                       | 93.2                                                      |
|                                 | Val       | 4           | 67.6                   | 0.114                | 102                                                       | 36.4                                                      |
|                                 |           | 10          | 331                    | 10.6                 | 565                                                       | 216                                                       |
|                                 | t-Hcy     | 4           | 4.25                   | 0.0928               | 5.84                                                      | 1.61                                                      |
|                                 |           | 10          | 22.8                   | 0.809                | 35.7                                                      | 7.66                                                      |
|                                 | GUAC      | 4           | 1.03                   | 0.0216               | 1.13                                                      | 0.787                                                     |
|                                 |           | 10          | 10.9                   | 0.442                | 13.1                                                      | 8.84                                                      |
|                                 | Leu       | 4           | 57.6                   | 0.350                | 63.7                                                      | 45.4                                                      |
|                                 |           | 10          | 354                    | 6.08                 | 429                                                       | 303                                                       |
|                                 | CRE       | 4           | 312                    | 4.89                 | 326                                                       | 234                                                       |
|                                 |           | 10          | 668                    | 12.6                 | 816                                                       | 549                                                       |
|                                 | MA        | 4           | 5.69                   | 0.101                | 7.33                                                      | 3.86                                                      |
|                                 |           | 10          | 43.5                   | 1.18                 | 54.3                                                      | 37.6                                                      |
|                                 | MMA       | 4           | 1.38                   | 0.0452               | 1.83                                                      | 0.99                                                      |
|                                 |           | 10          | 24.2                   | 0.648                | 32.8                                                      | 19.7                                                      |
|                                 | EMA       | 4           | 1.18                   | 0.0173               | 1.38                                                      | 0.895                                                     |
|                                 |           | 10          | 21.3                   | 0.455                | 26.3                                                      | 18.4                                                      |
|                                 | 3-HGA     | 4           | 0.368                  | 0.0386               | 0.465                                                     | 0.181                                                     |
|                                 |           | 10          | 5.72                   | 0.127                | 7.04                                                      | 4.69                                                      |
|                                 | 2-HGA     | 4           | 14.3                   | 0.200                | 15.5                                                      | 11.2                                                      |
|                                 |           | 10          | 45.1                   | 1.48                 | 55.3                                                      | 38.8                                                      |
|                                 | OA        | 4           | 0.918                  | 0.0214               | 0.966                                                     | 0.676                                                     |
|                                 |           | 10          | 24.8                   | 0.759                | 29.6                                                      | 20.4                                                      |
|                                 | MCA       | 4           | 0.531                  | 0.0116               | 0.581                                                     | 0.404                                                     |
|                                 |           | 10          | 10.6                   | 0.321                | 13.1                                                      | 8.89                                                      |
|                                 | LPC C20:0 | 4           | 0.124                  | 0.00638              | 0.135                                                     | 0.0786                                                    |
|                                 |           | 10          | 1.56                   | 0.0463               | 1.87                                                      | 1.08                                                      |
|                                 | LPC C22:0 | 4           | 0.0917                 | 0.0048               | 0.0997                                                    | 0.0625                                                    |
|                                 |           | 10          | 1.73                   | 0.0709               | 2.1                                                       | 1.26                                                      |
|                                 | LPC C24:0 | 4           | 0.113                  | 0.00616              | 0.127                                                     | 0.0763                                                    |
|                                 |           | 10          | 1.74                   | 0.0930               | 2.3                                                       | 1.22                                                      |
| LPC C26:0                       | 4         | 0.0913      | 0.00967                | 0.11                 | 0.0403                                                    |                                                           |
|                                 | 10        | 1.53        | 0.0939                 | 2.13                 | 0.973                                                     |                                                           |
| Ile                             | 4         | 29.9        | 0.453                  | 42.6                 | 21.2                                                      |                                                           |
|                                 | 10        | 326         | 8.96                   | 503                  | 262                                                       |                                                           |
| alle                            | 4         | 0.715       | 0.0204                 | 1.03                 | 0.489                                                     |                                                           |
|                                 | 10        | 4.81        | 0.176                  | 7.52                 | 3.88                                                      |                                                           |

Items in **bold with a gray background** are outside the specified limits.

Supplemental Table 11 Part 2. Stability DBS concentration after different treatments with upper and lower limits

| Treatment                      | Compound  | Level (DBS) | Mean ( $\mu\text{M}$ ) | SD ( $\mu\text{M}$ ) | Upper limit (imprecision mean + 3 x SD) ( $\mu\text{M}$ ) | Lower limit (imprecision mean - 3 x SD) ( $\mu\text{M}$ ) |
|--------------------------------|-----------|-------------|------------------------|----------------------|-----------------------------------------------------------|-----------------------------------------------------------|
| Extract stored for 24 hr at RT | CRN       | 4           | <b>30.7</b>            | 0.628                | 26.3                                                      | 16.1                                                      |
|                                |           | 10          | 157                    | 1.95                 | 174                                                       | 93.2                                                      |
|                                | Val       | 4           | 64.6                   | 2.52                 | 102                                                       | 36.4                                                      |
|                                |           | 10          | 360                    | 8.82                 | 565                                                       | 216                                                       |
|                                | t-Hcy     | 4           | 4.93                   | 0.0763               | 5.84                                                      | 1.61                                                      |
|                                |           | 10          | 25.8                   | 0.293                | 35.7                                                      | 7.66                                                      |
|                                | GUAC      | 4           | 1.06                   | 0.0276               | 1.13                                                      | 0.787                                                     |
|                                |           | 10          | 11.2                   | 0.246                | 13.1                                                      | 8.84                                                      |
|                                | Leu       | 4           | 58.3                   | 1.30                 | 63.7                                                      | 45.4                                                      |
|                                |           | 10          | 367                    | 5.17                 | 429                                                       | 303                                                       |
|                                | CRE       | 4           | 312                    | 4.34                 | 326                                                       | 234                                                       |
|                                |           | 10          | 706                    | 9.45                 | 816                                                       | 549                                                       |
|                                | MA        | 4           | 5.76                   | 0.135                | 7.33                                                      | 3.86                                                      |
|                                |           | 10          | 45.2                   | 0.540                | 54.3                                                      | 37.6                                                      |
|                                | MMA       | 4           | 1.34                   | 0.0164               | 1.83                                                      | 0.99                                                      |
|                                |           | 10          | 25.1                   | 0.600                | 32.8                                                      | 19.7                                                      |
|                                | EMA       | 4           | 1.19                   | 0.0430               | 1.38                                                      | 0.895                                                     |
|                                |           | 10          | 22                     | 0.311                | 26.3                                                      | 18.4                                                      |
|                                | 3-HGA     | 4           | 0.363                  | 0.0118               | 0.465                                                     | 0.181                                                     |
|                                |           | 10          | 5.94                   | 0.214                | 7.04                                                      | 4.69                                                      |
|                                | 2-HGA     | 4           | 14.6                   | 0.198                | 15.5                                                      | 11.2                                                      |
|                                |           | 10          | 47.3                   | 1.23                 | 55.3                                                      | 38.8                                                      |
|                                | OA        | 4           | 0.892                  | 0.0299               | 0.966                                                     | 0.676                                                     |
|                                |           | 10          | 25.7                   | 0.705                | 29.6                                                      | 20.4                                                      |
|                                | MCA       | 4           | 0.524                  | 0.0147               | 0.581                                                     | 0.404                                                     |
|                                |           | 10          | 11                     | 0.172                | 13.1                                                      | 8.89                                                      |
|                                | LPC C20:0 | 4           | 0.127                  | 0.00471              | 0.135                                                     | 0.0786                                                    |
|                                |           | 10          | 1.65                   | 0.0609               | 1.87                                                      | 1.08                                                      |
|                                | LPC C22:0 | 4           | 0.0943                 | 0.00263              | 0.0997                                                    | 0.0625                                                    |
|                                |           | 10          | 1.84                   | 0.0981               | 2.1                                                       | 1.26                                                      |
|                                | LPC C24:0 | 4           | <b>0.128</b>           | 0.0151               | 0.127                                                     | 0.0763                                                    |
|                                |           | 10          | 1.95                   | 0.0860               | 2.3                                                       | 1.22                                                      |
| LPC C26:0                      | 4         | 0.0977      | 0.0193                 | 0.11                 | 0.0403                                                    |                                                           |
|                                | 10        | 1.71        | 0.0439                 | 2.13                 | 0.973                                                     |                                                           |
| Ile                            | 4         | 30.1        | 0.332                  | 42.6                 | 21.2                                                      |                                                           |
|                                | 10        | 341         | 6.01                   | 503                  | 262                                                       |                                                           |
| alle                           | 4         | 0.71        | 0.0188                 | 1.03                 | 0.489                                                     |                                                           |
|                                | 10        | 4.89        | 0.144                  | 7.52                 | 3.88                                                      |                                                           |

Items in **bold with a gray background** are outside the specified limits.

Supplemental Table 11 Part 3. Stability DBS concentration after different treatments with upper and lower limits

| Treatment                   | Compound | Level (DBS) | Mean ( $\mu\text{M}$ ) | SD ( $\mu\text{M}$ ) | Upper limit (imprecision mean + 3 x SD) ( $\mu\text{M}$ ) | Lower limit (imprecision mean - 3 x SD) ( $\mu\text{M}$ ) |
|-----------------------------|----------|-------------|------------------------|----------------------|-----------------------------------------------------------|-----------------------------------------------------------|
| Spot stored for 24 hr at RT | CRN      | 4           | 24.2                   | 0.129                | 26.3                                                      | 16.1                                                      |
|                             |          | 10          | 143                    | 2.25                 | 174                                                       | 93.2                                                      |
|                             | Val      | 4           | 67                     | 2.90                 | 102                                                       | 36.4                                                      |
|                             |          | 10          | 335                    | 6.11                 | 565                                                       | 216                                                       |
|                             | t-Hcy    | 4           | 3.9                    | 0.0822               | 5.84                                                      | 1.61                                                      |
|                             |          | 10          | 21.8                   | 0.290                | 35.7                                                      | 7.66                                                      |
|                             | GUAC     | 4           | 1.05                   | 0.0196               | 1.13                                                      | 0.787                                                     |
|                             |          | 10          | 11                     | 0.133                | 13.1                                                      | 8.84                                                      |
|                             | Leu      | 4           | 58.4                   | 0.677                | 63.7                                                      | 45.4                                                      |
|                             |          | 10          | 361                    | 6.76                 | 429                                                       | 303                                                       |
|                             | CRE      | 4           | 312                    | 4.98                 | 326                                                       | 234                                                       |
|                             |          | 10          | 696                    | 11.2                 | 816                                                       | 549                                                       |
|                             | MA       | 4           | 5.88                   | 0.113                | 7.33                                                      | 3.86                                                      |
|                             |          | 10          | 45.9                   | 0.642                | 54.3                                                      | 37.6                                                      |
|                             | MMA      | 4           | 1.36                   | 0.0301               | 1.83                                                      | 0.99                                                      |
|                             |          | 10          | 24.7                   | 0.616                | 32.8                                                      | 19.7                                                      |
|                             | EMA      | 4           | 1.22                   | 0.0209               | 1.38                                                      | 0.895                                                     |
|                             |          | 10          | 22.1                   | 0.602                | 26.3                                                      | 18.4                                                      |
|                             | 3-HGA    | 4           | 0.341                  | 0.00497              | 0.465                                                     | 0.181                                                     |
|                             |          | 10          | 5.86                   | 0.171                | 7.04                                                      | 4.69                                                      |
|                             | 2-HGA    | 4           | 14.6                   | 0.267                | 15.5                                                      | 11.2                                                      |
|                             |          | 10          | 47                     | 1.15                 | 55.3                                                      | 38.8                                                      |
|                             | OA       | 4           | 0.907                  | 0.0281               | 0.966                                                     | 0.676                                                     |
|                             |          | 10          | 25.1                   | 0.456                | 29.6                                                      | 20.4                                                      |
|                             | MCA      | 4           | 0.533                  | 0.0110               | 0.581                                                     | 0.404                                                     |
|                             |          | 10          | 10.7                   | 0.264                | 13.1                                                      | 8.89                                                      |
|                             | LPC 20:0 | 4           | 0.122                  | 0.00236              | 0.135                                                     | 0.0786                                                    |
|                             |          | 10          | 1.57                   | 0.0186               | 1.87                                                      | 1.08                                                      |
|                             | LPC 22:0 | 4           | 0.0947                 | 0.00330              | 0.0997                                                    | 0.0625                                                    |
|                             |          | 10          | 1.77                   | 0.0503               | 2.1                                                       | 1.26                                                      |
|                             | LPC 24:0 | 4           | 0.115                  | 0.00492              | 0.127                                                     | 0.0763                                                    |
|                             |          | 10          | 1.86                   | 0.0565               | 2.3                                                       | 1.22                                                      |
| LPC 26:0                    | 4        | 0.081       | 0.00356                | 0.11                 | 0.0403                                                    |                                                           |
|                             | 10       | 1.61        | 0.0120                 | 2.13                 | 0.973                                                     |                                                           |
| Ile                         | 4        | 29.1        | 0.612                  | 42.6                 | 21.2                                                      |                                                           |
|                             | 10       | 320         | 7.62                   | 503                  | 262                                                       |                                                           |
| alle                        | 4        | 0.681       | 0.0271                 | 1.03                 | 0.489                                                     |                                                           |

|  |  |    |      |       |      |      |
|--|--|----|------|-------|------|------|
|  |  | 10 | 5.02 | 0.162 | 7.52 | 3.88 |
|--|--|----|------|-------|------|------|

Items in **bold with a gray background** are outside the specified limits.

Supplemental Table 11 Part 4. Stability DBS concentration after different treatments with upper and lower limits

| Treatment                            | Compound | Level (DBS) | Mean ( $\mu\text{M}$ ) | SD ( $\mu\text{M}$ ) | Upper limit (imprecision mean + 3 x SD) ( $\mu\text{M}$ ) | Lower limit (imprecision mean - 3 x SD) ( $\mu\text{M}$ ) |
|--------------------------------------|----------|-------------|------------------------|----------------------|-----------------------------------------------------------|-----------------------------------------------------------|
| DBS exposed to 3x freeze thaw cycles | CRN      | 4           | 22.6                   | 0.726                | 26.3                                                      | 16.1                                                      |
|                                      |          | 10          | 139                    | 5.81                 | 174                                                       | 93.2                                                      |
|                                      | Val      | 4           | 65.1                   | 4.88                 | 102                                                       | 36.4                                                      |
|                                      |          | 10          | 330                    | 4.74                 | 565                                                       | 216                                                       |
|                                      | t-Hcy    | 4           | 4.05                   | 0.0977               | 5.84                                                      | 1.61                                                      |
|                                      |          | 10          | 22                     | 0.293                | 35.7                                                      | 7.66                                                      |
|                                      | GUAC     | 4           | 1.01                   | 0.0199               | 1.13                                                      | 0.787                                                     |
|                                      |          | 10          | 10.6                   | 0.373                | 13.1                                                      | 8.84                                                      |
|                                      | Leu      | 4           | 55.8                   | 2.62                 | 63.7                                                      | 45.4                                                      |
|                                      |          | 10          | 352                    | 10.1                 | 429                                                       | 303                                                       |
|                                      | CRE      | 4           | 296                    | 10.6                 | 326                                                       | 234                                                       |
|                                      |          | 10          | 681                    | 24.4                 | 816                                                       | 549                                                       |
|                                      | MA       | 4           | 5.6                    | 0.220                | 7.33                                                      | 3.86                                                      |
|                                      |          | 10          | 44.9                   | 1.43                 | 54.3                                                      | 37.6                                                      |
|                                      | MMA      | 4           | 1.28                   | 0.0800               | 1.83                                                      | 0.99                                                      |
|                                      |          | 10          | 24.3                   | 0.980                | 32.8                                                      | 19.7                                                      |
|                                      | EMA      | 4           | 1.14                   | 0.0289               | 1.38                                                      | 0.895                                                     |
|                                      |          | 10          | 21.7                   | 0.719                | 26.3                                                      | 18.4                                                      |
|                                      | 3-HGA    | 4           | 0.32                   | 0.0236               | 0.465                                                     | 0.181                                                     |
|                                      |          | 10          | 5.78                   | 0.167                | 7.04                                                      | 4.69                                                      |
|                                      | 2-HGA    | 4           | 13.9                   | 0.681                | 15.5                                                      | 11.2                                                      |
|                                      |          | 10          | 45.9                   | 1.60                 | 55.3                                                      | 38.8                                                      |
|                                      | OA       | 4           | 0.884                  | 0.0371               | 0.966                                                     | 0.676                                                     |
|                                      |          | 10          | 24.7                   | 0.691                | 29.6                                                      | 20.4                                                      |
|                                      | MCA      | 4           | 0.51                   | 0.0200               | 0.581                                                     | 0.404                                                     |
|                                      |          | 10          | 10.6                   | 0.302                | 13.1                                                      | 8.89                                                      |
|                                      | LPC 20:0 | 4           | 0.118                  | 0.00283              | 0.135                                                     | 0.0786                                                    |
|                                      |          | 10          | 1.5                    | 0.0421               | 1.87                                                      | 1.08                                                      |
|                                      | LPC 22:0 | 4           | 0.0953                 | 0.00419              | 0.0997                                                    | 0.0625                                                    |
|                                      |          | 10          | 1.67                   | 0.0515               | 2.1                                                       | 1.26                                                      |
|                                      | LPC 24:0 | 4           | 0.108                  | 0.00309              | 0.127                                                     | 0.0763                                                    |
|                                      |          | 10          | 1.72                   | 0.0875               | 2.3                                                       | 1.22                                                      |
| LPC 26:0                             | 4        | 0.078       | 0.00327                | 0.11                 | 0.0403                                                    |                                                           |
|                                      | 10       | 1.56        | 0.152                  | 2.13                 | 0.973                                                     |                                                           |
| Ile                                  | 4        | 28.1        | 1.68                   | 42.6                 | 21.2                                                      |                                                           |
|                                      | 10       | 314         | 11.4                   | 503                  | 262                                                       |                                                           |



|  |      |    |       |        |      |       |
|--|------|----|-------|--------|------|-------|
|  | alle | 4  | 0.695 | 0.0189 | 1.03 | 0.489 |
|  |      | 10 | 4.96  | 0.245  | 7.52 | 3.88  |

Items in **bold with a gray background** are outside the specified limits.

## REFERENCES

1. Oglesbee, D.; Sanders, K. A.; Lacey, J. M.; Magera, M. J.; Casetta, B.; Strauss, K. A.; Tortorelli, S.; Rinaldo, P.; Matern, D., Second-tier test for quantification of alloisoleucine and branched-chain amino acids in dried blood spots to improve newborn screening for maple syrup urine disease (MSUD). *Clin Chem* **2008**, *54* (3), 542-9.
2. Okun, J. G.; Gan-Schreier, H.; Ben-Omran, T.; Schmidt, K. V.; Fang-Hoffmann, J.; Gramer, G.; Abdoh, G.; Shahbeck, N.; Al Rifai, H.; Al Khal, A. L.; Haege, G.; Chiang, C.-C.; Kasper, D. C.; Wilcken, B.; Burgard, P.; Hoffmann, G. F., Newborn Screening for Vitamin B(6) Non-responsive Classical Homocystinuria: Systematical Evaluation of a Two-Tier Strategy. *JIMD Rep* **2017**, *32*, 87-94.
3. Turgeon, C. T.; Magera, M. J.; Cuthbert, C. D.; Loken, P. R.; Gavrillov, D. K.; Tortorelli, S.; Raymond, K. M.; Oglesbee, D.; Rinaldo, P.; Matern, D., Determination of Total Homocysteine, Methylmalonic Acid, and 2-Methylcitric Acid in Dried Blood Spots by Tandem Mass Spectrometry. *Clinical Chemistry* **2010**, *56* (11), 1686-1695.
4. Janzen, N.; Steuerwald, U.; Sander, S.; Terhardt, M.; Peter, M.; Sander, J., UPLC-MS/MS analysis of C5-acylcarnitines in dried blood spots. *Clinica chimica acta; international journal of clinical chemistry* **2013**, *421*, 41-5.
5. Al-Dirbashi, O. Y.; Kölker, S.; Ng, D.; Fisher, L.; Rupar, T.; Lepage, N.; Rashed, M. S.; Santa, T.; Goodman, S. I.; Geraghty, M. T.; Zschocke, J.; Christensen, E.; Hoffmann, G. F.; Chakraborty, P., Diagnosis of glutaric aciduria type 1 by measuring 3-hydroxyglutaric acid in dried urine spots by liquid chromatography tandem mass spectrometry. *J Inherit Metab Dis* **2011**, *34* (1), 173-80.
6. Haynes, C. A.; De Jesús, V. R., Improved analysis of C26:0-lysophosphatidylcholine in dried-blood spots via negative ion mode HPLC-ESI-MS/MS for X-linked adrenoleukodystrophy newborn screening. *Clinica Chimica Acta* **2012**, *413* (15), 1217-1221.
7. Janzen, N.; Peter, M.; Sander, S.; Steuerwald, U.; Terhardt, M.; Holtkamp, U.; Sander, J., Newborn Screening for Congenital Adrenal Hyperplasia: Additional Steroid Profile using Liquid Chromatography-Tandem Mass Spectrometry. *The Journal of Clinical Endocrinology & Metabolism* **2007**, *92* (7), 2581-2589.
8. Tortorelli, S.; Eckerman, J. S.; Orsini, J. J.; Stevens, C.; Hart, J.; Hall, P. L.; Alexander, J. J.; Gavrillov, D.; Oglesbee, D.; Raymond, K.; Matern, D.; Rinaldo, P., Moonlighting newborn screening markers: the incidental discovery of a second-tier test for Pompe disease. *Genetics in Medicine* **2018**, *20* (8), 840-846.
9. Ramaswamy, M.; Skrinska, V. A.; Abdoh, G.; Mahmoud Ahmed, L.; Mitri, R. F.; Joshi, R., A Rare Case of Malonic Aciduria Diagnosed by Newborn Screening in Qatar. *Int. J. Neonatal Screen.* **2017**, *3* (1), 5.
10. Test ID: HGEM Hydroxyglutaric Acids, Glutaric Acid, Ethylmalonic Acid, and Methylsuccinic Acid, Blood Spot. <https://www.mayocliniclabs.com/test-catalog/Clinical+and+Interpretive/62230> (accessed 4/23/2020).
11. Gallant, N. M.; Leydiker, K.; Tang, H.; Feuchtbaum, L.; Lorey, F.; Puckett, R.; Deignan, J. L.; Neidich, J.; Dorrani, N.; Chang, E.; Barshop, B. A.; Cederbaum, S. D.; Abdenur, J. E.; Wang, R. Y., Biochemical, molecular, and clinical characteristics of children with short chain acyl-CoA dehydrogenase deficiency detected by newborn screening in California. *Molecular Genetics and Metabolism* **2012**, *106* (1), 55-61.
12. Sinclair, G. B.; van Karnebeek, C. D. M.; Ester, M.; Boyd, F.; Nelson, T.; Stockler-Ipsiroglu, S.; Vallance, H., A three-tier algorithm for guanidinoacetate methyltransferase (GAMT) deficiency newborn screening. *Molecular Genetics and Metabolism* **2016**, *118* (3), 173-177.
13. D'Apolito, O.; Garofalo, D.; Paglia, G.; Zuppaldi, A.; Corso, G., Orotic acid quantification in dried blood spots and biological fluids by hydrophilic interaction liquid chromatography tandem mass spectrometry. *Journal of separation science* **2010**, *33* (6-7), 966-73.
14. Chuang, W. L.; Pacheco, J.; Zhang, X. K.; Martin, M. M.; Biski, C. K.; Keutzer, J. M.; Wenger, D. A.; Caggana, M.; Orsini, J. J., Jr., Determination of psychosine concentration in dried blood spots from newborns that were identified via newborn screening to be at risk for Krabbe disease. *Clinica chimica acta; international journal of clinical chemistry* **2013**, *419*, 73-6.
15. Baric, I.; Wagner, L.; Feyh, P.; Liesert, M.; Buckel, W.; Hoffmann, G. F., Sensitivity and specificity of free and total glutaric acid and 3-hydroxyglutaric acid measurements by stable-isotope dilution assays for the diagnosis of glutaric aciduria type I. *J Inherit Metab Dis* **1999**, *22* (8), 867-81.
16. Janzen, N.; Sander, S.; Terhardt, M.; Steuerwald, U.; Peter, M.; Das, A. M.; Sander, J., Rapid steroid hormone quantification for congenital adrenal hyperplasia (CAH) in dried blood spots using UPLC liquid chromatography-tandem mass spectrometry. *Steroids* **2011**, *76* (13), 1437-1442.
